# Supplementary material
Source: PubMed Central journal article supplement (PMC4248994)
Supplement: AEM.02464-14_zam999105794so1.pdf [file AEM.02464-14_zam999105794so1.pdf]

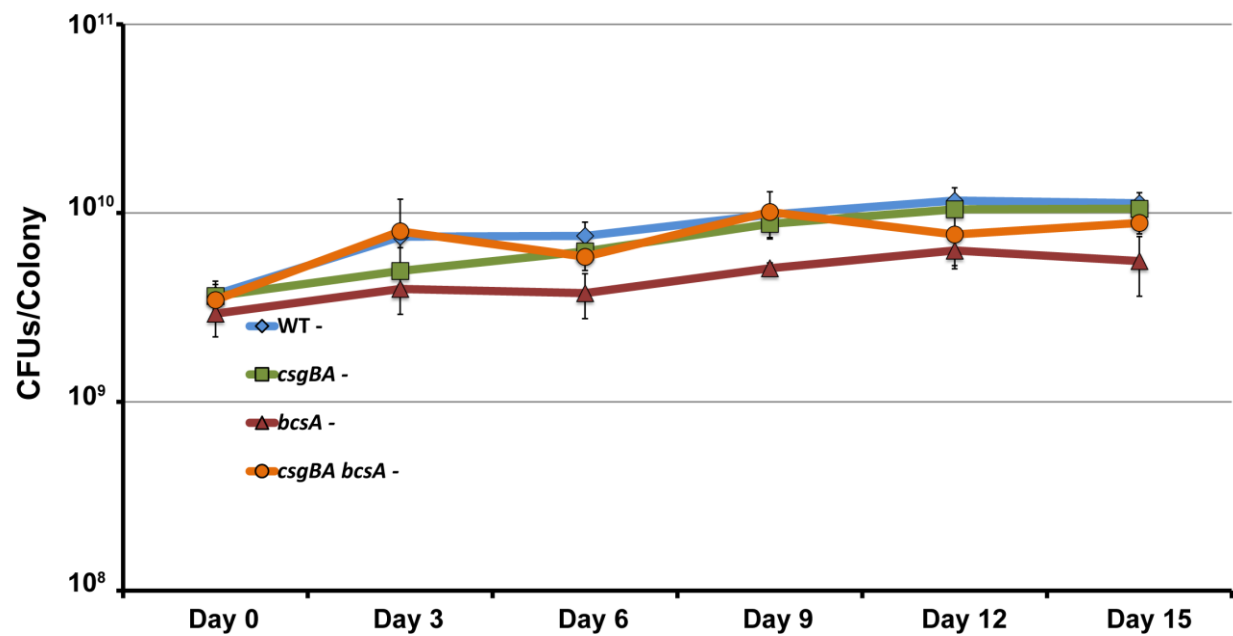

**Figure S1 UTI89 CFUs without Predation**

CFUs from UTI89 without *C. elegans* predation demonstrate a slight increase over the 15 day experimental time course.

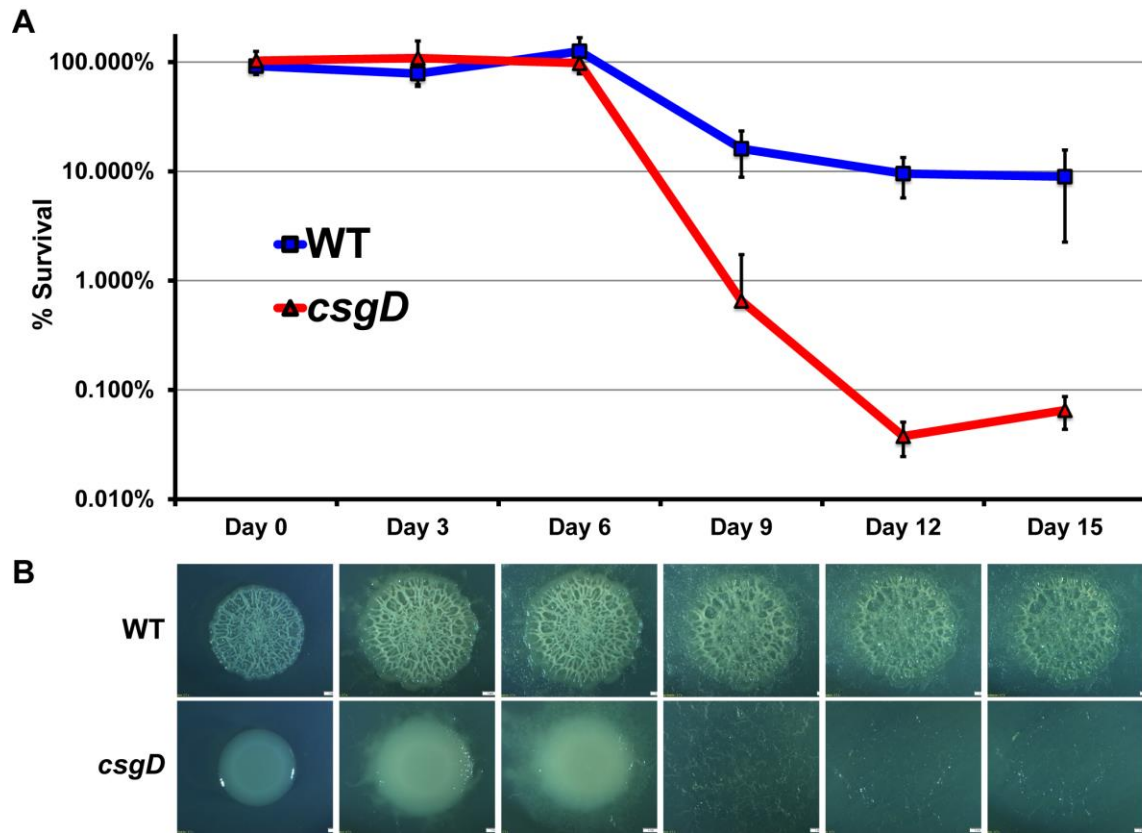

**Figure S2 *C. elegans* feeding on WT UTI89 or a *csgD* mutant individually**

~25 L1-L2 *C. elegans* worms were moved to the center of an agar plate on which 6 WT UTI89 colonies or UTI89 *csgD* colonies had grown for two days in biofilm-inducing conditions. At three-day intervals, one dot per plate was harvested for CFU counts, and percent survival was calculated (compared to plates with no *C. elegans* predation) **(A)**. An image was taken of each strain at each time point **(B)**.

12 Days

- Nematodes

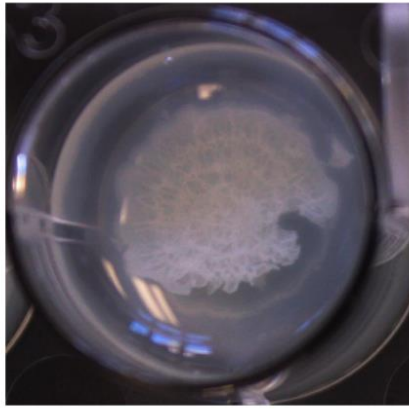

+ Nematodes

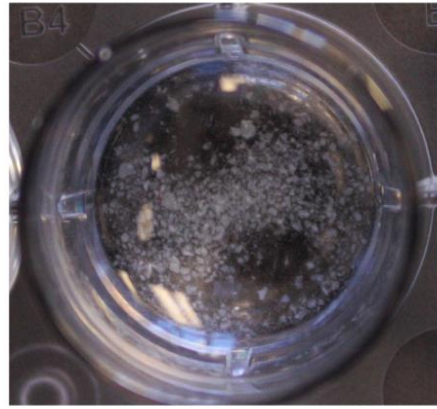

**Figure S3 *C. elegans* feeding results in a fragile biofilm**

After moving an agar section to a well of a 24-well plate, 1 mL of kPi buffer was added to a WT UTI89 rugose colony biofilm that had or had not been exposed to *C. elegans* for 12 days. *C. elegans* feeding resulted in a biofilm that was more fragile and that broke apart easily.

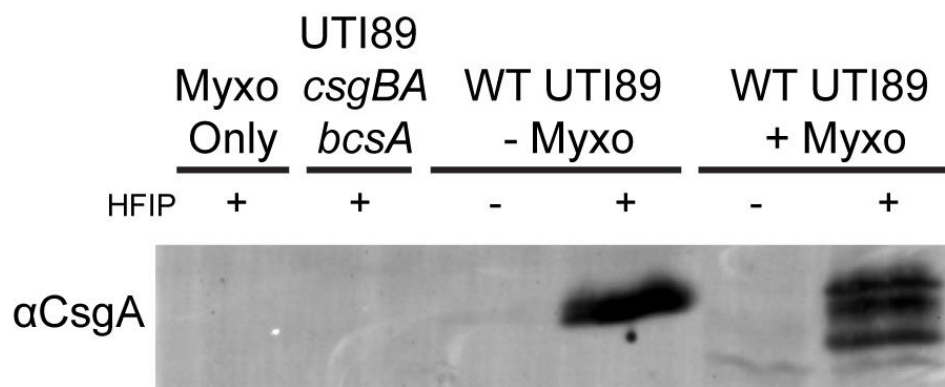

**Figure S4 SDS-insoluble CsgA still present after *M. xanthus* predation**

WT UTI89 was incubated at 30°C for 10 days with or without *M. xanthus* predation.

Western blot analysis probing for CsgA was performed with or without pre-treatment with HFIP. WT *M. xanthus* and a UTI89 *csgBA bcsA* mutant serve as controls.

10 Days + *M. xanthus*

WT

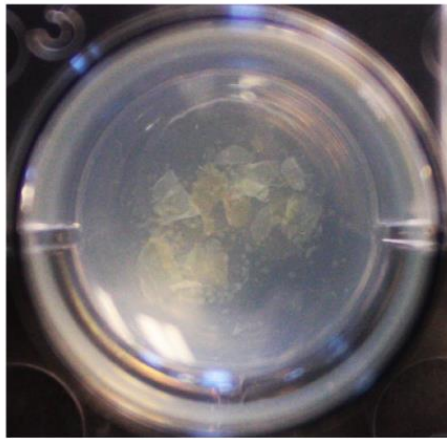

*csgBA*

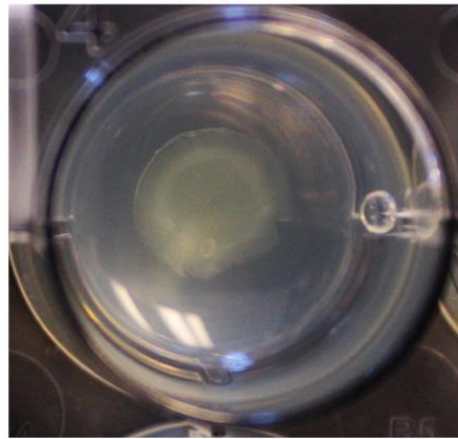

**Figure S5 Biofilm fragility after *M. xanthus* predation**

After *M. xanthus* feeding, 1 mL of kPi was added to WT UTI89 and the *csgBA* mutant.

WT broke into large chunks upon agitation, and the *csgBA* colony maintained its shape even after washing off the agar.

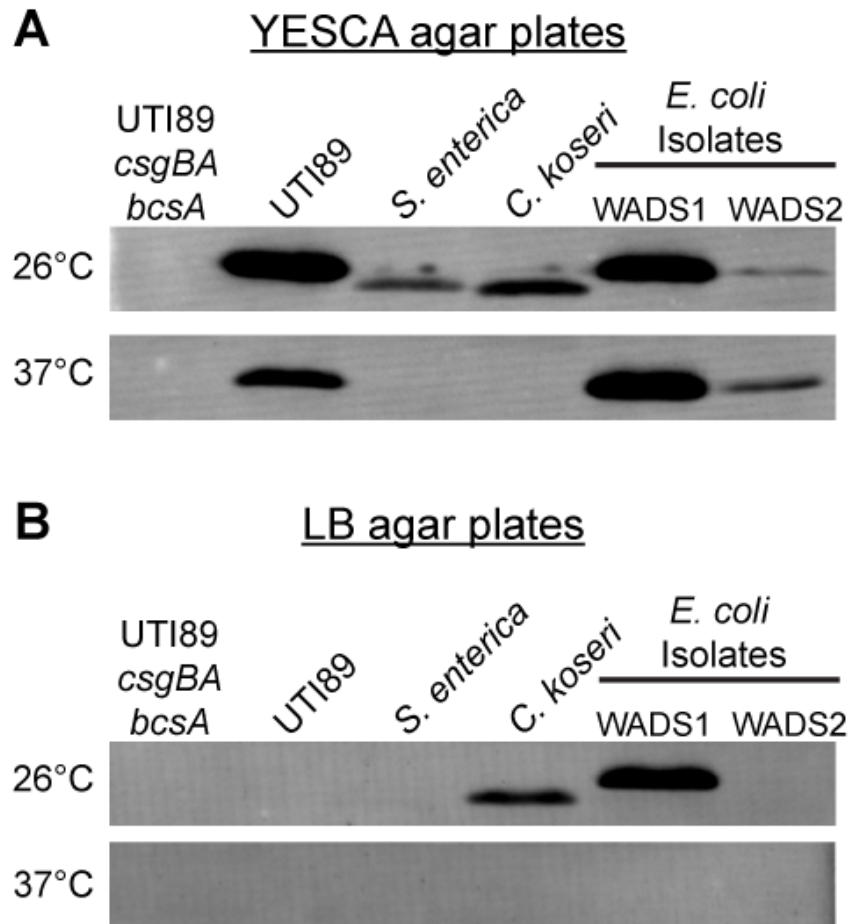

**Figure S6 *Enterobacteriaceae* curli production on YESCA and LB plates**

A western blot for the major curli subunit CsgA was performed on various *Enterobacteriaceae* strains grown on YESCA **(A)** or LB **(B)** agar plates for two days at 26°C or 37°C.

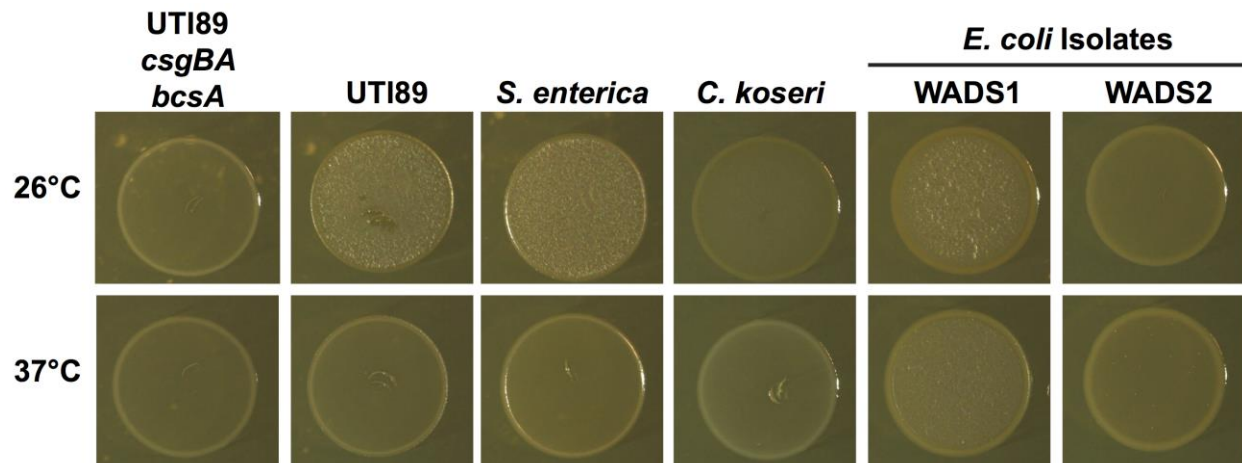

**Figure S7 Growth on cow dung agar plates**

UTI89, *S. enterica* ser. Typhimurium, *C. koseri*, and two *E. coli* strains isolated from pig dung (WADS1 and WADS2) were grown on cow dung agar plates for two days at 26°C or 37° C. Rugose biofilm development was apparent by UTI89 and *S. enterica* ser. Typhimurium when grown at 26°C.

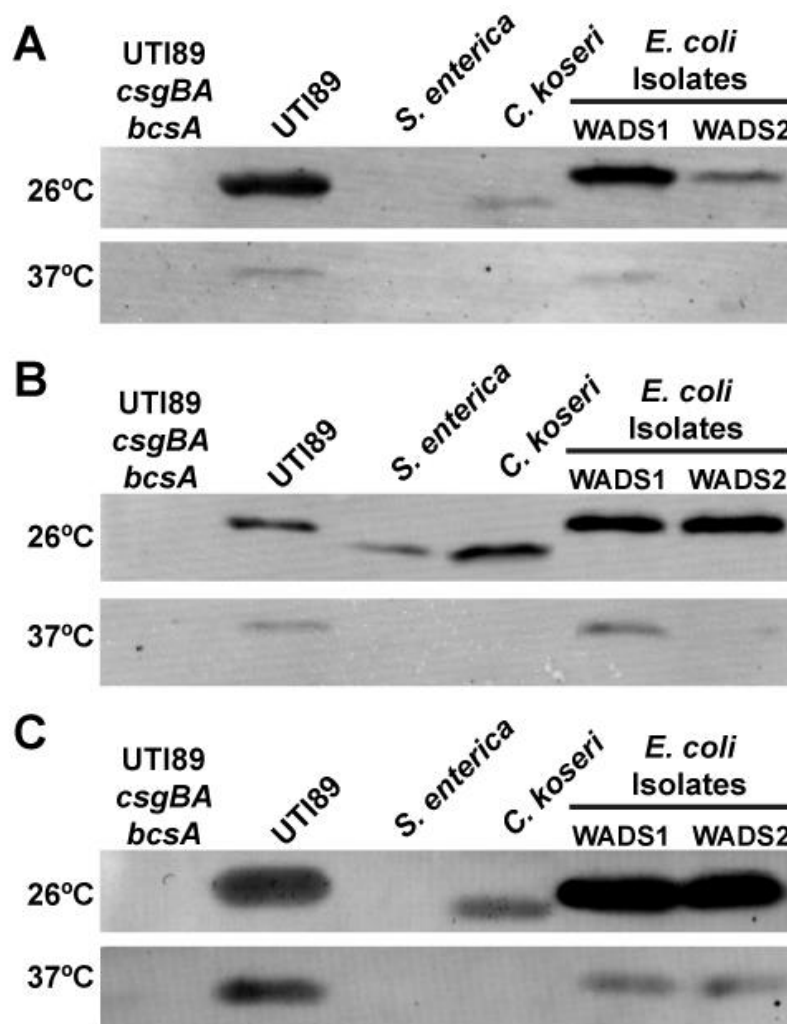

**Figure S8 Curli production on food agar plates**

After 2 days of growth at 26°C or 37°C on beef **(A)**, chicken **(B)**, or spinach **(C)** agar plates, western blot analysis to probe for the major curli subunit CsgA was performed.

All western blot samples were treated with HFIP to depolymerize CsgA.

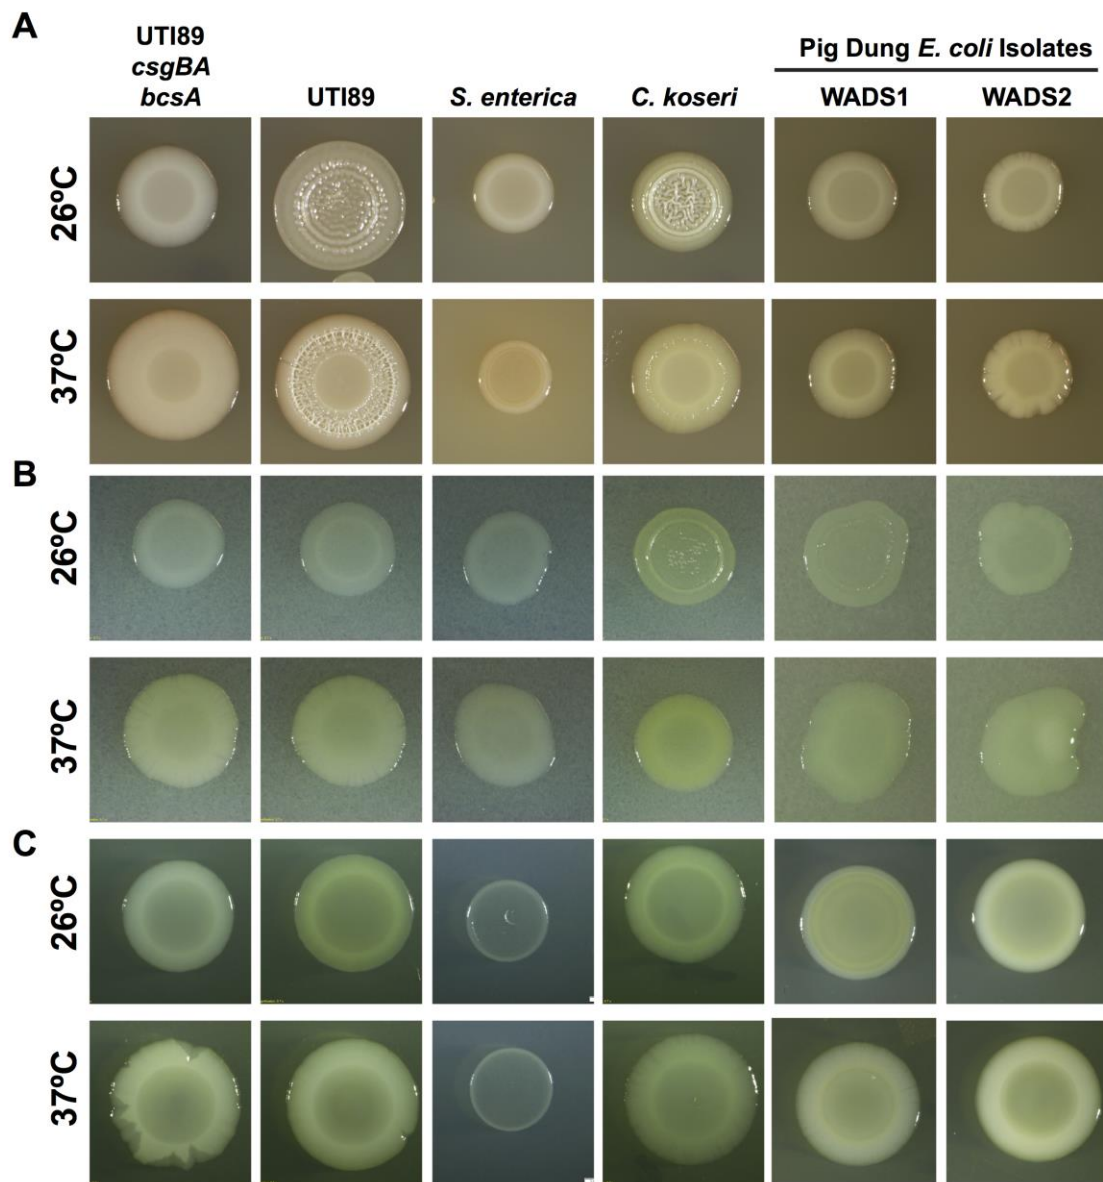

**Figure S9 Growth and morphology on food agar plates**

UTI89, *S. enterica* ser. Typhimurium, *C. koseri*, and two *E. coli* strains isolated from pig dung were grown on beef **(A)**, chicken **(B)**, or spinach **(C)** agar plates for two days at 26°C or 37° C.
